# Supplementary material
Source: PubMed Central journal article supplement (PMC7592935)
Supplement: ocl-0098-0575-s02.pdf [file ocl-0098-0575-s02.pdf]

**Table S1.** Cancer-related genes represented in the TruSeq Amplicon Cancer Panel (Illumina)

| Genes         |              |              |               |                |
|---------------|--------------|--------------|---------------|----------------|
| <i>ABL1</i>   | <i>EGFR</i>  | <i>GNAS</i>  | <i>MLH1</i>   | <i>RET</i>     |
| <i>AKT1</i>   | <i>ERBB2</i> | <i>HNF1A</i> | <i>MPL</i>    | <i>SMAD4</i>   |
| <i>ALK</i>    | <i>ERBB4</i> | <i>HRAS</i>  | <i>NOTCH1</i> | <i>SMARCB1</i> |
| <i>APC</i>    | <i>FBXW7</i> | <i>IDH1</i>  | <i>NPM1</i>   | <i>SMO</i>     |
| <i>ATM</i>    | <i>FGFR1</i> | <i>JAK2</i>  | <i>NRAS</i>   | <i>SRC</i>     |
| <i>BRAF</i>   | <i>FGFR2</i> | <i>JAK3</i>  | <i>PDGFRA</i> | <i>STK11</i>   |
| <i>CDH1</i>   | <i>FGFR3</i> | <i>KDR</i>   | <i>PIK3CA</i> | <i>TP53</i>    |
| <i>CDKN2A</i> | <i>FLT3</i>  | <i>KIT</i>   | <i>PTEN</i>   | <i>VHL</i>     |
| <i>CSF1R</i>  | <i>GNA11</i> | <i>KRAS</i>  | <i>PTPN1</i>  |                |
| <i>CTNNB1</i> | <i>GNAQ</i>  | <i>MET</i>   | <i>RBI</i>    |                |

**Table S2.** Distribution of gene mutations in the studied population, stratified according to tumor location; colon or rectum

| Gene mutation                        | Samples with gene mutation:<br>Colon<br>(n=51) | %     | Samples with gene mutation:<br>Rectum<br>(n=34) | %     | P-value |
|--------------------------------------|------------------------------------------------|-------|-------------------------------------------------|-------|---------|
| <i>ABL1</i>                          | 4                                              | 7.8   | 0                                               | 0.0   | 0.15    |
| <i>AKT1</i> <sup>1</sup>             | 1                                              | 2.0   | 1                                               | 2.9   | 1.00    |
| <i>ALK</i>                           | 2                                              | 3.9   | 1                                               | 2.9   | 1.00    |
| <i>APC</i> <sup>1</sup>              | 24                                             | 47.1  | 20                                              | 58.8  | 0.37    |
| <i>ATM</i>                           | 4                                              | 7.8   | 3                                               | 8.8   | 1.00    |
| <i>ATM, C11ORF65</i>                 | 39                                             | 76.5  | 25                                              | 73.5  | 0.80    |
| <i>BRAF</i> <sup>1</sup>             | 16                                             | 31.4  | 1                                               | 2.9   | 0.0016  |
| <i>CSF1R</i>                         | 1                                              | 2.0   | 0                                               | 0.0   | 1.00    |
| <i>CTNNB1</i> <sup>1</sup>           | 4                                              | 7.8   | 1                                               | 2.9   | 0.65    |
| <i>EGFR</i> <sup>1</sup>             | 3                                              | 5.9   | 3                                               | 8.8   | 1.00    |
| <i>ERBB2</i>                         | 0                                              | 0.0   | 1                                               | 2.9   | 1.00    |
| <i>ERBB4</i>                         | 5                                              | 9.8   | 1                                               | 2.9   | 0.39    |
| <i>FBXW7</i> <sup>1</sup>            | 7                                              | 13.7  | 5                                               | 14.7  | 1.00    |
| <i>FGFR1</i>                         | 8                                              | 15.7  | 9                                               | 26.5  | 0.27    |
| <i>FGFR3</i>                         | 10                                             | 19.6  | 3                                               | 8.8   | 0.23    |
| <i>FLT3</i>                          | 47                                             | 92.2  | 33                                              | 97.1  | 0.64    |
| <i>GNAI1</i>                         | 7                                              | 13.7  | 8                                               | 23.5  | 0.26    |
| <i>GNAQ</i>                          | 40                                             | 78.4  | 26                                              | 76.5  | 1.00    |
| <i>GNAS</i>                          | 1                                              | 2.0   | 1                                               | 2.9   | 1.00    |
| <i>HNF1A</i>                         | 7                                              | 13.7  | 7                                               | 20.6  | 0.55    |
| <i>HRAS</i>                          | 4                                              | 7.8   | 1                                               | 2.9   | 0.64    |
| <i>JAK3</i>                          | 1                                              | 2.0   | 2                                               | 5.9   | 1.00    |
| <i>KDR</i>                           | 51                                             | 100.0 | 34                                              | 100.0 | -       |
| <i>KIT</i>                           | 47                                             | 92.2  | 32                                              | 94.1  | 1.00    |
| <i>KRAS</i> <sup>1</sup>             | 14                                             | 27.5  | 11                                              | 32.4  | 0.64    |
| <i>MET</i> <sup>1</sup>              | 2                                              | 3.9   | 2                                               | 5.9   | 1.00    |
| <i>Chr22 rs35893428</i> <sup>2</sup> | 27                                             | 52.9  | 13                                              | 38.2  | 0.26    |
| <i>Chr2 rs1059524</i> <sup>2</sup>   | 19                                             | 37.3  | 17                                              | 50.0  | 1.00    |
| <i>Chr7 rs3735146</i> <sup>2</sup>   | 1                                              | 2.0   | 2                                               | 5.9   | 1.00    |
| <i>NPM1</i>                          | 1                                              | 2.0   | 0                                               | 0.0   | 1.00    |
| <i>NRAS</i> <sup>1</sup>             | 1                                              | 2.0   | 2                                               | 5.9   | 1.00    |
| <i>PIK3CA</i> <sup>1</sup>           | 47                                             | 92.2  | 30                                              | 88.2  | 0.70    |
| <i>PTEN</i> <sup>1</sup>             | 29                                             | 56.9  | 19                                              | 55.9  | 1.00    |
| <i>RBI</i>                           | 11                                             | 21.6  | 8                                               | 23.5  | 1.00    |
| <i>RET</i>                           | 1                                              | 2.0   | 2                                               | 5.9   | 1.00    |
| <i>SMO</i>                           | 49                                             | 96.1  | 32                                              | 94.1  | 1.00    |
| <i>TP53</i> <sup>1</sup>             | 51                                             | 100.0 | 34                                              | 100.0 | -       |
| <i>VHL</i>                           | 3                                              | 5.9   | 2                                               | 5.9   | 1.00    |

<sup>1</sup>CRC-associated gene as defined by the gene panel

<sup>2</sup>No gene assigned

**Table S3.** Distribution of gene mutations in the studied population, stratified according to tumor differentiation grade; poor differentiation or moderate/well differentiation grade

| Gene mutation                        | Samples with gene mutation:<br>Poor differentiation<br>(n=20) | %     | Samples with gene mutation:<br>Moderate/well differentiation<br>(n=65) | %     | P-value  |
|--------------------------------------|---------------------------------------------------------------|-------|------------------------------------------------------------------------|-------|----------|
| <i>ABL1</i>                          | 3                                                             | 15.0  | 1                                                                      | 1.5   | 0.039    |
| <i>AKT1</i> <sup>1</sup>             | 1                                                             | 5.0   | 1                                                                      | 1.5   | 0.42     |
| <i>ALK</i>                           | 1                                                             | 5.0   | 2                                                                      | 3.1   | 0.56     |
| <i>APC</i> <sup>1</sup>              | 5                                                             | 25.0  | 39                                                                     | 60.0  | 0.01     |
| <i>ATM</i>                           | 2                                                             | 10.0  | 5                                                                      | 7.7   | 0.67     |
| <i>ATM, C11ORF65</i>                 | 14                                                            | 70.0  | 50                                                                     | 76.9  | 0.56     |
| <i>BRAF</i> <sup>1</sup>             | 13                                                            | 65.0  | 4                                                                      | 6.2   | < 0.0001 |
| <i>CSF1R</i>                         | 0                                                             | 0.0   | 1                                                                      | 1.5   | 1.00     |
| <i>CTNNB1</i> <sup>1</sup>           | 0                                                             | 0.0   | 5                                                                      | 7.7   | 0.33     |
| <i>EGFR</i> <sup>1</sup>             | 1                                                             | 5.0   | 5                                                                      | 7.7   | 1.00     |
| <i>ERBB2</i>                         | 0                                                             | 0.0   | 1                                                                      | 1.5   | 1.00     |
| <i>ERBB4</i>                         | 2                                                             | 10.0  | 4                                                                      | 6.2   | 0.62     |
| <i>FBXW7</i> <sup>1</sup>            | 3                                                             | 15.0  | 9                                                                      | 13.8  | 1.00     |
| <i>FGFR1</i>                         | 6                                                             | 30.0  | 11                                                                     | 16.9  | 0.21     |
| <i>FGFR3</i>                         | 5                                                             | 25.0  | 8                                                                      | 12.3  | 0.17     |
| <i>FLT3</i>                          | 18                                                            | 90.0  | 62                                                                     | 95.4  | 0.59     |
| <i>GNA11</i>                         | 3                                                             | 15.0  | 12                                                                     | 18.5  | 1.00     |
| <i>GNAQ</i>                          | 16                                                            | 80.0  | 50                                                                     | 76.9  | 1.00     |
| <i>GNAS</i>                          | 2                                                             | 10.0  | 0                                                                      | 0.0   | 1.00     |
| <i>HNF1A</i>                         | 4                                                             | 20.0  | 10                                                                     | 15.4  | 0.73     |
| <i>HRAS</i>                          | 3                                                             | 15.0  | 2                                                                      | 3.1   | 0.08     |
| <i>JAK3</i>                          | 1                                                             | 5.0   | 2                                                                      | 3.1   | 0.56     |
| <i>KDR</i>                           | 20                                                            | 100.0 | 65                                                                     | 100.0 | -        |
| <i>KIT</i>                           | 18                                                            | 90.0  | 61                                                                     | 93.8  | 0.62     |
| <i>KRAS</i> <sup>1</sup>             | 2                                                             | 10.0  | 23                                                                     | 35.4  | 0.047    |
| <i>MET</i> <sup>1</sup>              | 0                                                             | 0.0   | 4                                                                      | 6.2   | 0.57     |
| <i>Chr22 rs35893428</i> <sup>2</sup> | 9                                                             | 45.0  | 31                                                                     | 47.7  | 1.00     |
| <i>Chr2 rs1059524</i> <sup>2</sup>   | 10                                                            | 50.0  | 25                                                                     | 38.5  | 0.30     |
| <i>Chr7 rs3735146</i> <sup>2</sup>   | 0                                                             | 0.0   | 3                                                                      | 4.6   | 1.00     |
| <i>NPM1</i>                          | 1                                                             | 5.0   | 0                                                                      | 0.0   | 0.24     |
| <i>NRAS</i> <sup>1</sup>             | 1                                                             | 5.0   | 2                                                                      | 3.1   | 0.56     |
| <i>PIK3CA</i> <sup>1</sup>           | 16                                                            | 80.0  | 61                                                                     | 93.8  | 0.08     |
| <i>PTEN</i> <sup>1</sup>             | 14                                                            | 70.0  | 34                                                                     | 52.3  | 0.20     |
| <i>RBI</i>                           | 3                                                             | 15.0  | 16                                                                     | 24.6  | 0.54     |
| <i>RET</i>                           | 0                                                             | 0.0   | 3                                                                      | 4.6   | 1.00     |
| <i>SMO</i>                           | 19                                                            | 95.0  | 62                                                                     | 95.4  | 1.00     |
| <i>TP53</i> <sup>1</sup>             | 20                                                            | 100.0 | 65                                                                     | 100.0 | -        |
| <i>VHL</i>                           | 1                                                             | 5.0   | 4                                                                      | 6.2   | 1.00     |

<sup>1</sup>CRC-associated gene as defined by the gene panel

<sup>2</sup>No gene assigned

**Table S4.** Distribution of gene mutations in the studied population, stratified according to cancer recurrence at follow-up

| Gene mutation                        | Samples with gene mutation: Cancer recurrence (n=12) | %     | Samples with gene mutation: No cancer recurrence (n=73) | %     | P-value | Total number of samples with gene mutation | %     |
|--------------------------------------|------------------------------------------------------|-------|---------------------------------------------------------|-------|---------|--------------------------------------------|-------|
| <i>ABL1</i>                          | 0                                                    | 0.0   | 4                                                       | 5.5   | 1.00    | 4                                          | 4.7   |
| <i>AKT1</i> <sup>1</sup>             | 0                                                    | 0.0   | 2                                                       | 2.7   | 1.00    | 2                                          | 2.4   |
| <i>ALK</i>                           | 2                                                    | 16.7  | 1                                                       | 1.4   | 1.00    | 3                                          | 3.5   |
| <i>APC</i> <sup>1</sup>              | 7                                                    | 58.3  | 37                                                      | 50.7  | 0.76    | 44                                         | 51.8  |
| <i>ATM</i>                           | 2                                                    | 16.7  | 5                                                       | 6.8   | 0.26    | 7                                          | 8.2   |
| <i>ATM, C11ORF65</i>                 | 5                                                    | 41.7  | 59                                                      | 80.8  | 0.007   | 64                                         | 75.3  |
| <i>BRAF</i> <sup>1</sup>             | 4                                                    | 33.3  | 13                                                      | 17.8  | 0.25    | 17                                         | 20.0  |
| <i>CSF1R</i>                         | 0                                                    | 0.0   | 1                                                       | 1.4   | 1.00    | 1                                          | 1.2   |
| <i>CTNNB1</i> <sup>1</sup>           | 1                                                    | 8.3   | 4                                                       | 5.5   | 0.54    | 5                                          | 5.9   |
| <i>EGFR</i> <sup>1</sup>             | 0                                                    | 0.0   | 6                                                       | 8.2   | 0.59    | 6                                          | 7.1   |
| <i>ERBB2</i>                         | 0                                                    | 0.0   | 1                                                       | 1.4   | 1.00    | 1                                          | 1.2   |
| <i>ERBB4</i>                         | 0                                                    | 0.0   | 6                                                       | 8.2   | 0.59    | 6                                          | 7.1   |
| <i>FBXW7</i> <sup>1</sup>            | 1                                                    | 8.3   | 11                                                      | 15.1  | 1.00    | 12                                         | 14.1  |
| <i>FGFR1</i>                         | 4                                                    | 33.3  | 13                                                      | 17.8  | 0.24    | 17                                         | 20.0  |
| <i>FGFR3</i>                         | 1                                                    | 8.3   | 12                                                      | 16.4  | 0.68    | 13                                         | 15.3  |
| <i>FLT3</i>                          | 11                                                   | 91.7  | 69                                                      | 94.5  | 0.54    | 80                                         | 94.1  |
| <i>GNA11</i>                         | 2                                                    | 16.7  | 13                                                      | 17.8  | 1.00    | 15                                         | 17.6  |
| <i>GNAQ</i>                          | 8                                                    | 66.7  | 58                                                      | 79.5  | 0.45    | 66                                         | 77.6  |
| <i>GNAS</i>                          | 0                                                    | 0.0   | 2                                                       | 2.7   | 1.00    | 2                                          | 2.4   |
| <i>HNF1A</i>                         | 2                                                    | 16.7  | 12                                                      | 16.4  | 1.00    | 14                                         | 16.5  |
| <i>HRAS</i>                          | 2                                                    | 16.7  | 3                                                       | 4.1   | 0.14    | 5                                          | 5.9   |
| <i>JAK3</i>                          | 0                                                    | 0.0   | 3                                                       | 4.1   | 1.00    | 3                                          | 3.5   |
| <i>KDR</i>                           | 12                                                   | 100.0 | 73                                                      | 100.0 | -       | 85                                         | 100.0 |
| <i>KIT</i>                           | 12                                                   | 100.0 | 67                                                      | 91.8  | 0.59    | 79                                         | 92.9  |
| <i>KRAS</i> <sup>1</sup>             | 3                                                    | 25.0  | 22                                                      | 30.1  | 1.00    | 25                                         | 29.4  |
| <i>MET</i> <sup>1</sup>              | 0                                                    | 0.0   | 4                                                       | 5.5   | 1.00    | 4                                          | 4.7   |
| <i>Chr22 rs35893428</i> <sup>2</sup> | 5                                                    | 41.7  | 35                                                      | 47.9  | 0.76    | 40                                         | 47.1  |
| <i>Chr2 rs1059524</i> <sup>2</sup>   | 7                                                    | 58.3  | 29                                                      | 39.7  | 0.34    | 36                                         | 42.4  |
| <i>Chr7 rs3735146</i> <sup>2</sup>   | 0                                                    | 0.0   | 3                                                       | 4.1   | 1.00    | 3                                          | 3.5   |
| <i>NPM1</i>                          | 0                                                    | 0.0   | 1                                                       | 1.4   | 1.00    | 1                                          | 1.2   |
| <i>NRAS</i> <sup>1</sup>             | 0                                                    | 0.0   | 3                                                       | 4.1   | 1.00    | 3                                          | 3.5   |
| <i>PIK3CA</i> <sup>1</sup>           | 10                                                   | 83.3  | 67                                                      | 91.8  | 0.31    | 77                                         | 90.6  |
| <i>PTEN</i> <sup>1</sup>             | 4                                                    | 33.3  | 44                                                      | 60.3  | 0.12    | 48                                         | 56.5  |
| <i>RBI</i>                           | 4                                                    | 33.3  | 15                                                      | 20.5  | 0.45    | 19                                         | 22.4  |
| <i>RET</i>                           | 0                                                    | 0.0   | 3                                                       | 4.1   | 1.00    | 3                                          | 3.5   |
| <i>SMO</i>                           | 12                                                   | 100.0 | 69                                                      | 94.5  | 1.00    | 81                                         | 95.3  |
| <i>TP53</i> <sup>1</sup>             | 12                                                   | 100.0 | 73                                                      | 100.0 | -       | 85                                         | 100.0 |
| <i>VHL</i>                           | 0                                                    | 0.0   | 5                                                       | 6.8   | 1.00    | 5                                          | 5.9   |

<sup>1</sup>Classified as CRC-associated gene according to the gene panel

<sup>2</sup>No gene assigned

**Table S5.** Association between cancer specific survival and gene mutation status, described in terms of hazard ratios, HR

| Gene mutation                             | HR (95% CI)         | HR <i>P</i> -value |
|-------------------------------------------|---------------------|--------------------|
| <i>APC</i> <sup>1</sup>                   | 1.63 (0.39 – 6.84)  | 0.50               |
| <i>ATM, C11ORF65</i>                      | 0.31 (0.08 – 1.25)  | 0.10               |
| <i>BRAF</i> <sup>1</sup>                  | 1.57 (0.32 – 7.80)  | 0.58               |
| <i>CTNNB1</i> <sup>1,3</sup>              | 2.68 (0.33 – 21.96) | 0.36               |
| <i>FBXW7</i> <sup>1</sup>                 | 0.79 (0.10 – 6.41)  | 0.82               |
| <i>FGFR1</i>                              | 2.23 (0.53 – 9.32)  | 0.27               |
| <i>FGFR3</i>                              | 0.87 (0.11 – 7.10)  | 0.90               |
| <i>GNA11</i>                              | 0.58 (0.07 – 4.79)  | 0.61               |
| <i>GNAQ</i>                               | 0.48 (0.11 – 1.99)  | 0.31               |
| <i>HNF1A</i> <sup>4</sup>                 | -                   | -                  |
| <i>HRAS</i> <sup>3</sup>                  | 5.78 (1.17 – 28.71) | 0.031              |
| <i>KRAS</i> <sup>1</sup>                  | 1.48 (0.35 – 6.19)  | 0.59               |
| <i>Chr22 rs35893428</i> <sup>2</sup>      | 1.13 (0.28 – 4.53)  | 0.86               |
| <i>Chr2 rs1059524</i> <sup>2</sup>        | 2.34 (0.56 – 9.81)  | 0.24               |
| <i>PIK3CA</i> <sup>1</sup>                | 0.72 (0.09 – 5.84)  | 0.76               |
| <i>PTEN</i> <sup>1</sup>                  | 0.49 (0.12 – 2.04)  | 0.32               |
| <i>RB1</i>                                | 3.36 (0.84 – 13.46) | 0.09               |
| <i>APC or CTNNB1</i> <sup>1</sup>         | 1.37 (0.33 – 5.76)  | 0.67               |
| <i>KRAS, BRAF, NRAS</i> <sup>1</sup>      | 1.60 (0.38 – 6.69)  | 0.52               |
| <i>KRAS, BRAF, NRAS, APC</i> <sup>1</sup> | 2.48 (0.30 – 20.18) | 0.40               |

Genes with mutation present in at least ten patients were included in the analysis. <sup>1</sup>Classified as CRC-associated gene according to the gene panel, <sup>2</sup>No gene assigned, <sup>3</sup>Five patients with gene mutation, *CTNNB1* included based on its involvement in the Wnt signaling pathway, *HRAS* based on the significant result, although few patients with gene mutation, <sup>4</sup>*HNF1A*; no gene mutation detected in uncensored patients. HR; hazard ratio, CI; confidence interval.

**Table S6a.** Association between recurrence free survival and the total number of gene mutations and total mutation count per patient, expressed in terms of hazard ratios

|                      | HR   | 95% CI      | <i>P</i> -value |
|----------------------|------|-------------|-----------------|
| Gene mutation CRC    | 0.77 | 0.49 – 1.20 | 0.25            |
| Gene mutation (tot)  | 0.83 | 0.63 – 1.09 | 0.18            |
| Mutation count CRC   | 0.96 | 0.68 – 1.34 | 0.80            |
| Mutation count (tot) | 0.91 | 0.76 – 1.09 | 0.32            |

HR; hazard ratio, CI; confidence interval, CRC; colorectal cancer

**Table S6b.** Logistic regression analysis for the association of the number of gene mutations and mutation count with poor tumor differentiation grade

|                      | OR: Poor differentiation | 95% CI      | <i>P</i> -value |
|----------------------|--------------------------|-------------|-----------------|
| Gene mutation CRC    | 0.86                     | 0.57 – 1.30 | 0.47            |
| Gene mutation (tot)  | 1.05                     | 0.81 – 1.36 | 0.71            |
| Mutation count CRC   | 0.84                     | 0.61 – 1.15 | 0.28            |
| Mutation count (tot) | 1.00                     | 0.84 – 1.18 | 0.96            |

OR; odds ratio, CI; confidence interval, CRC; colorectal cancer

**Table S6c.** Logistic regression analysis for the association of the number of gene mutations and mutation count with the risk of colon cancer compared with rectal cancer

|                      | OR: Colon cancer | 95% CI      | <i>P</i> -value |
|----------------------|------------------|-------------|-----------------|
| Gene mutation CRC    | 1.09             | 0.76 – 1.56 | 0.64            |
| Gene mutation (tot)  | 1.01             | 0.81 – 1.27 | 0.91            |
| Mutation count CRC   | 1.06             | 0.81 – 1.38 | 0.67            |
| Mutation count (tot) | 1.03             | 0.89 – 1.19 | 0.71            |

OR; odds ratio, CI; confidence interval, CRC; colorectal cancer
